# Supplementary material for: Healthcare worker practices for HPV vaccine recommendation: A systematic review and meta-analysis
Source: Hum Vaccin Immunother. 2024 Oct 14;20(1):2402122. doi: 10.1080/21645515.2024.2402122 (PMC11486212; doi:10.1080/21645515.2024.2402122)
Supplement: Appendix 7_Quailty assessment of included articles.pdf [file KHVI_A_2402122_SM6235.pdf]

[illegible]

[illegible]

[illegible]

| Lasset, et al  | Lee, et al     | Leung, et al.  | Lutringer-Magnin, et al. | Mao, et al.    | Maynard, et al. | McCave, et al | Merriel, et al. | Mohamed et al. | Napolitano, et al. |
|----------------|----------------|----------------|--------------------------|----------------|-----------------|---------------|-----------------|----------------|--------------------|
| Yes            | Yes            | Yes            | Yes                      | Yes            | Yes             | Yes           | Yes             | Yes            | Yes                |
| Yes            | Yes            | Yes            | Yes                      | Yes            | Yes             | Yes           | Yes             | Yes            | Yes                |
| Unclear        | Unclear        | Not applicable | Yes                      | Not applicable | Yes             | Yes           | Yes             | Yes            | Yes                |
| Not applicable | Not applicable | Yes            | Not applicable           | Yes            | Yes             | Yes           | Not applicable  | Not applicable | Not applicable     |
| Yes            | Yes            | Yes            | Yes                      | Yes            | Yes             | Yes           | Yes             | Yes            | Yes                |
| Yes            | Yes            | Yes            | Yes                      | Yes            | No              | Yes           | Yes             | Yes            | Yes                |
| Unclear        | Unclear        | Unclear        | Unclear                  | Unclear        | Unclear         | Yes           | Yes             | Yes            | Yes                |
| Yes            | Yes            | Unclear        | Yes                      | Yes            | Yes             | Yes           | Yes             | Yes            | Yes                |

[illegible]

[illegible]

[illegible]

|                                                                                                                               | Agyei-Baffour, et al, | Kahn, et al (2007) | Krupp, et al. | Lasset, et al | Lutringer-Magnin, et al | Moya, et al | Tron, et al. |
|-------------------------------------------------------------------------------------------------------------------------------|-----------------------|--------------------|---------------|---------------|-------------------------|-------------|--------------|
| Question                                                                                                                      |                       |                    |               |               |                         |             |              |
| 1. Is there congruity between the stated philosophical perspective and                                                        | Yes                   | Yes                | Yes           | Yes           | Yes                     | Yes         | Yes          |
| 2. Is there congruity between the research methodology and the research                                                       | Yes                   | Yes                | Yes           | Yes           | Yes                     | Yes         | Yes          |
| 3. Is there congruity between the research methodology and the methods                                                        | Yes                   | Yes                | Yes           | Yes           | Yes                     | Yes         | Yes          |
| 4. Is there congruity between the research methodology and the                                                                | Yes                   | Yes                | Yes           | Yes           | Yes                     | Yes         | Yes          |
| 5. Is there congruity between the research                                                                                    | No                    | Yes                | Yes           | Yes           | Yes                     | Yes         | Yes          |
| 6. Is there a statement locating the researcher                                                                               | No                    | Yes                | No            | No            | No                      | No          | Yes          |
| 7. Is the influence of the researcher on the research, and                                                                    | No                    | Yes                | No            | No            | No                      | No          | Yes          |
| 8. Are participants, and their voices, adequately                                                                             | Yes                   | Yes                | Yes           | Yes           | No                      | Yes         | Yes          |
| 9. Is the research ethical according to current criteria or, for recent studies, and is there evidence of ethical approval by | Yes                   | Yes                | Yes           | Yes           | Yes                     | Yes         | Yes          |
| 10. Do the conclusions drawn in the research report flow from the analysis, or                                                | Yes                   | Yes                | Yes           | Yes           | Yes                     | Yes         | Yes          |
